# Supplementary material
Source: Springer Nature journal article supplement (https://www.springermedizin.de/resource/supplementary/12887_2014_1183_MOESM1_ESM.pdf/9476620)
Supplement: MOESM1 [file 9476620]

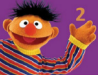

# ERNIE 2

acutely ill children (1m-16y), primary care, Flanders

*history, physical examination*

## DECISION TREE

- something is wrong
- dyspnoea
- fever ( $\geq 40^\circ$ )
- diarrhoea if  $\geq 1y$  and  $\leq 2,5y$

$\geq 1$  item +

POC CRP

all items -

## DIAGNOSTIC TRIAL

- serious infections

## CLUSTER RANDOMISED FACTORIAL TRIAL

*Cluster = practice level*

- I. POC CRP
- II. brief intervention & safety net
- III. POC CRP + brief intervention & safety net
- IV. usual care

- antibiotic prescribing rate
- clinical recovery
- parental concern
- parental perception of communication
- use of medication, diagnostic tests and medical services
- health economic evaluation
